# Supplementary material for: Adherence to evidence-based practice across healthcare professionals in Germany: results from a cross-sectional, nationwide survey
Source: Springer Nature journal article supplement (doi:10.1186/s12913-022-08682-z), 2022-10-25
Supplement: MOESM2 [file 23639484]

Additional file 2: Media used to inform the community of healthcare professionals in Germany about the online survey

|                                      | Description                                                                                                                        | Homepage post | Facebook post | Twitter post | Press release | Newsletter <sup>1</sup> |
|--------------------------------------|------------------------------------------------------------------------------------------------------------------------------------|---------------|---------------|--------------|---------------|-------------------------|
| Universities/<br>Research<br>Centers | Hochschule für Gesundheit (University of Applied Sciences; host institution)                                                       | X             | X             | X            | X             |                         |
|                                      | MedEcon Ruhr (German network for health economy in the Ruhr area)                                                                  | X             |               |              |               |                         |
|                                      | Fakultät für Sportwissenschaften RUB (Faculty for sport sciences of the Ruhr University Bochum)                                    |               | O             |              |               |                         |
| Societies                            | Deutsches Netzwerk Evidenzbasierte Medizin (German network for evidence based medicine)                                            | X             |               |              |               |                         |
|                                      | Deutscher Bundesverband für akademische Sprachtherapie und Logopädie e.V. (German federal association for academic speech therapy) | X             |               |              |               |                         |
|                                      | LOGO Deutschland e.V. (German association for self-employed speech therapists)                                                     | X             |               |              |               | X                       |
|                                      | Deutsche Gesellschaft für Physiotherapiewissenschaft e.V. (German society for physiotherapy science)                               | X             | X             | X            |               |                         |
|                                      | Physio-Deutschland e.V. (German association for physiotherapy)                                                                     | X             | X             |              |               |                         |
|                                      | Verband Physikalische Therapie e.V. (German association for physical therapy)                                                      | X             |               |              |               |                         |
|                                      | Deutscher Verband der Ergotherapeuten (German association of occupational therapists)                                              |               | X             |              |               |                         |
|                                      | Bundesverband für Ergotherapeuten in Deutschland. e.V. (German federal association for occupational therapists)                    |               | X             |              |               |                         |
|                                      | Deutsche Gesellschaft für Hebammenwissenschaften e.V. (German society of midwifery science)                                        | X             |               |              |               |                         |
|                                      | Hebammen NRW (German midwifery association North Rhine-Westphalia)                                                                 |               | O             |              |               |                         |
|                                      | Hebammenlandesverband Bremen e.V. (German midwifery association bremen)                                                            | X             | X             |              |               |                         |

|                                                                                                                                                                                                                                                                                                                                                |                                                                                                                                         |   |   |  |  |  |
|------------------------------------------------------------------------------------------------------------------------------------------------------------------------------------------------------------------------------------------------------------------------------------------------------------------------------------------------|-----------------------------------------------------------------------------------------------------------------------------------------|---|---|--|--|--|
|                                                                                                                                                                                                                                                                                                                                                | Deutscher Verband für Podologie (ZFD) e.V. (German association for podology)                                                            |   | O |  |  |  |
|                                                                                                                                                                                                                                                                                                                                                | Deutsche Gesellschaft für HNO-Heilkunde, Kopf- und Hals-Chirurgie e.V. (German society of oto-rhino-laryngology, head and neck surgery) | X |   |  |  |  |
|                                                                                                                                                                                                                                                                                                                                                | Gesellschaft zur wissenschaftlichen Untersuchung von Parawissenschaften (Society for the scientific investigation of parasciences)      | X |   |  |  |  |
| <b>Journals and Newspapers</b>                                                                                                                                                                                                                                                                                                                 | Medizin Aspekte (German online journal for healthcare professions)                                                                      | X |   |  |  |  |
|                                                                                                                                                                                                                                                                                                                                                | idw - Informationsdienst Wissenschaft (Online service for scientific information and research)                                          | X |   |  |  |  |
|                                                                                                                                                                                                                                                                                                                                                | Pflegewissenschaft (German journal for nursing sciences)                                                                                | X |   |  |  |  |
|                                                                                                                                                                                                                                                                                                                                                | pt - Zeitschrift für Physiotherapeuten (German journal for physiotherapists)                                                            |   | O |  |  |  |
|                                                                                                                                                                                                                                                                                                                                                | Thieme liebt Physiotherapeuten (German Facebook group of a publisher for physiotherapy media and journals)                              |   | O |  |  |  |
|                                                                                                                                                                                                                                                                                                                                                | Focus Online Local (Local online news journal)                                                                                          | X |   |  |  |  |
|                                                                                                                                                                                                                                                                                                                                                | Lokalkompass (Local online news journal for the region of Bochum)                                                                       | X |   |  |  |  |
|                                                                                                                                                                                                                                                                                                                                                | JuraForum (German online platform for legal issues)                                                                                     | X |   |  |  |  |
|                                                                                                                                                                                                                                                                                                                                                | Ärzte Zeitung (German journal for medical practitioners)                                                                                |   | O |  |  |  |
| <b>Informal groups in social media</b>                                                                                                                                                                                                                                                                                                         | ErgoXchange (Facebook page of an online service for occupational therapist)                                                             |   | O |  |  |  |
|                                                                                                                                                                                                                                                                                                                                                | Physio meets science (Facebook page for evidence-based medicine in physiotherapy)                                                       |   | O |  |  |  |
|                                                                                                                                                                                                                                                                                                                                                | Sportwissenschaften.net (Facebook page for sport sciences and fitness)                                                                  |   | O |  |  |  |
|                                                                                                                                                                                                                                                                                                                                                | Podologie und Fußpflege (Facebook group for podology and medical footcare)                                                              |   | C |  |  |  |
|                                                                                                                                                                                                                                                                                                                                                | Podologie und Podologen in Deutschland (Facebook group for podology in Germany)                                                         |   | C |  |  |  |
|                                                                                                                                                                                                                                                                                                                                                | Physiotherapie Deutschland (Facebook group for physiotherapists in Germany)                                                             |   | C |  |  |  |
| <p>X = the survey has been advertised/posted/communicated/reported/distributed in/via this media; O = post in an "open group" in a social media (the post is accessible to the public in this social media); C = post in a closed group in a social media (the post is visible for group members only)</p> <p><sup>1</sup> for subscribers</p> |                                                                                                                                         |   |   |  |  |  |
